# Supplementary material for: Effects of yeast trehalose-6-phosphate synthase 1 on gene expression and carbohydrate contents of potato leaves under drought stress conditions
Source: PubMed Central journal article supplement (PMC3459809; doi:10.1186/1471-2229-12-74), 2012-05-30

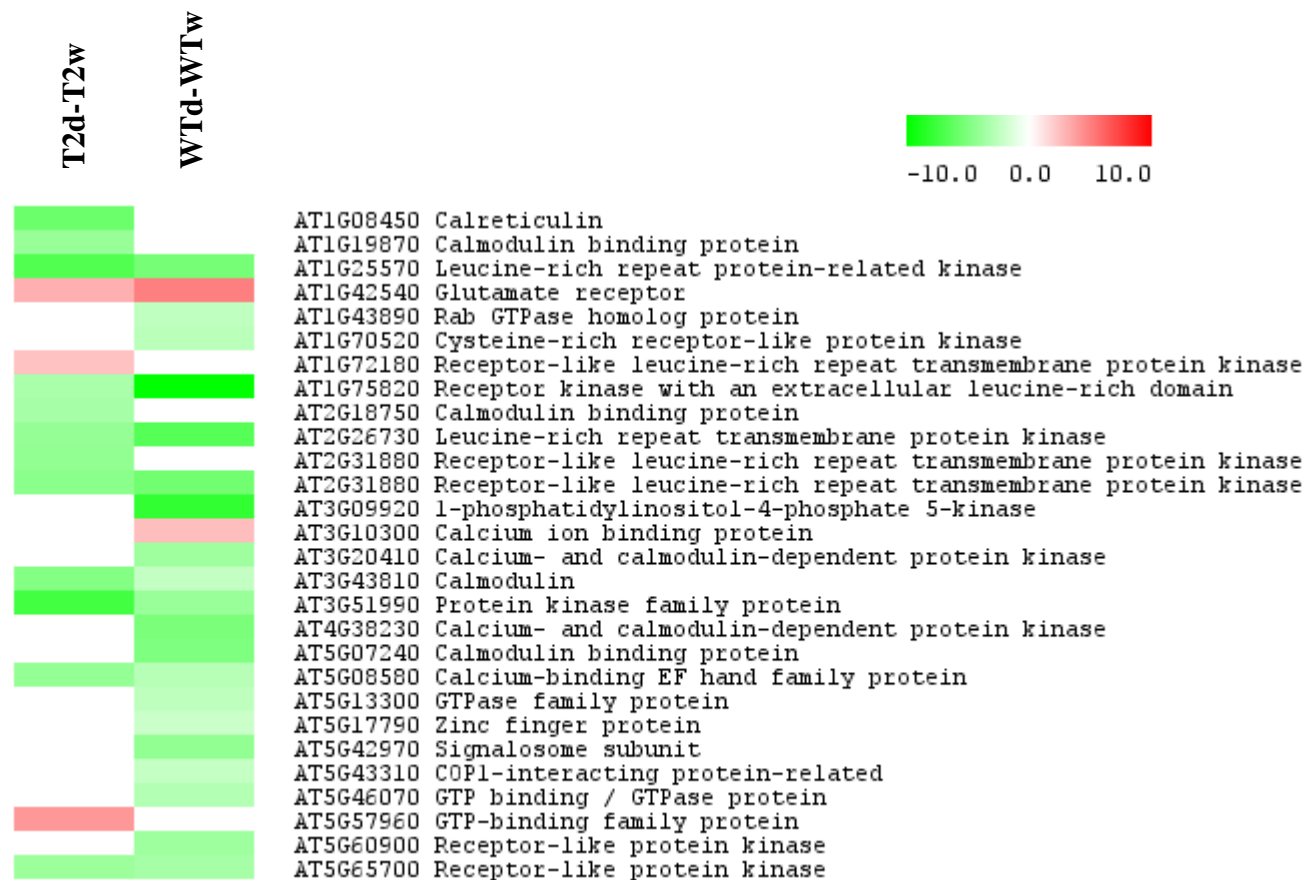

Supplement: 1471-2229-12-74-S5.pdf [file 1471-2229-12-74-S5.pdf]
